# Supplementary material for: Serum zinc in patients with colorectal cancer might contribute to the prediction of tumor clinical staging scores： a prospective single-center clinical study
Source: Research Square preprint supplement (doi:10.21203/rs.3.rs-2493694/v1), 2023-01-26
Supplement: Supplementary file 1 [file 51f1aeac54ceb2177236036b.docx]

| Variables | Male | Female | Standardize diff. | P-value | P-value* |
| --- | --- | --- | --- | --- | --- |
| Gender of control | 16 | 16 |  |  |  |
| Age, years, mean ± SD | 44±14 | 44±17 | 0 (-0, 1) | 0.973 | 0.985 |
| Gender of patients | 53 | 21 |  |  |  |
| Age, years, mean ± SD | 65 ± 11 | 61 ± 10 | 0 (-0, 1) | 0.329 | 0.152 |
| Tumor Biomarkers | **geometric Mean (95% CI)** | |  |  |  |
| AFP | 2.99 (2.61 3.43) | 2.52 (2.11 3.00) | 0.46 (-0.08, 0.99) | 0.149 | 0.157 |
| Ca125 | 22.35 (13.97 35.74) | 14.64 (7.95 26.98) | 0.22 (-0.45, 0.90) | 0.284 | 0.134 |
| Ca199 | 178.01 (82.05 386.18) | 74.03 (42.02 130.44) | 1.02 (0.22, 1.81) | 0.218 | 0.317 |
| CEA | 154.74 (95.64 250.38) | 125.47 (74.53 211.24) | 0.30 (-0.25, 0.80) | 0.620 | 0.411 |
| Patients’ serum trace elements | **geometric Mean (95% CI)** | |  |  |  |
| Mg | 19.56 (18.92 20.21) | 18.83 (17.73 20.20) | 0.30 (-0.21 0.81) | 0.258 | 0.202 |
| Fe | 0.90 (0.76 1.06) | 0.85 (0.65 1.10) | 0.11 (-0.40, 0.61) | 0.715 | 0.418 |
| Cu | 1150.89 (1071.45 1236.23) | 1190.87 (1093.07 1297.43) | 0.08 (-0.43, 0.58) | 0.597 | 0.569 |
| Zn | 0.73 (0.68 0.79) | 0.70 (0.61 0.79) | 0.18 (-0.33, 0.68) | 0.494 | 0.938 |
| Ca | 74.82 (68.39 81.86) | 71.61 (60.03 85.42) | 0.11 (-0.40, 0.62) | 0.635 | 0.468 |
| Se | 100.98 (94.10 108.37) | 92.58 (83.36 102.82) | 0.38 (-0.13, 0.89) | 0.195 | 0.498 |
| Control’serum trace elements | **geometric Mean (95% CI)** | |  |  |  |
| Mg | 21.23 (20.38 22.13) | 20.94 (20.27 21.64) | 0.19 (-0.50, 0.89) | 0.614 | 0.327 |
| Fe | 1.31 (1.08 1.59) | 1.41 (1.20 1.65) | 0.14 (-0.55, 0.84) | 0.589 | 0.534 |
| Cu | 999.64 (903.93 1105.48) | 941.42 (867.11 1022.10) | 0.34 (-0.35, 1.04) | 0.373 | 0.651 |
| Zn | 0.89 (0.78 1.01) | 0.84 (0.79 0.90) | 0.31 (-0.39, 1.01) | 0.435 | 0.749 |
| Ca | 92.27 (89.56 95.05) | 92.82 (91.12 94.55) | 0.09 (-0.60, 0.78) | 0.740 | 0.122 |
| Se | 112.81 (103.30 123.20) | 112.54 (105.18 120.43) | 0.05 (-0.64, 0.75) | 0.967 | 0.970 |
| Stage | **mean (N%)** | |  |  |  |
| I | 2 (7%) | 0 (0%) |  |  |  |
| II | 8 (28%) | 1 (8%) |  |  |  |
| III | 11 (38%) | 7 (58%) |  |  |  |
| IV | 8 (28%) | 4 (33%) |  |  |  |

**Table1:** **Baseline characters of participants**

*P*-values* in the table: Kruskal Wallis rank sum test for continuous variables, Fisher exact probability test for count variables with theoretical numbers<10. *P*-value in the table indicates that there is a significant difference at a level of 0.05 between the designated two groups.
